# Supplementary material
Source: PubMed Central journal article supplement (PMC10796080)

Appendix Exhibit A1

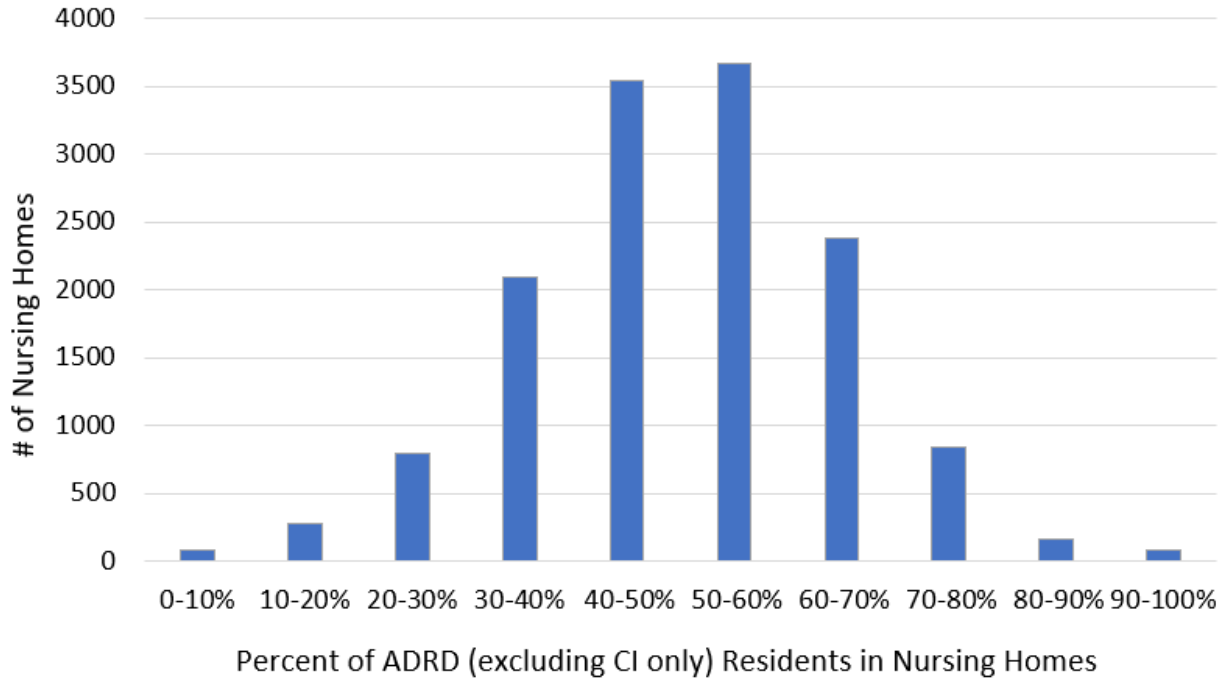

Supplement: NIHMS1953813-supplement-Appendix_Exhibit_A1.pdf [file NIHMS1953813-supplement-Appendix_Exhibit_A1.pdf]
